# Supplementary material
Source: PubMed Central journal article supplement (PMC10534204)

## Supplementary Material

### Health Outcomes by Neighborhood (HON): Effects of neighborhood, social instability, and health factors on 12-month trajectories of substance-use disorder symptoms

Figure 1. Interaction plots display estimated probabilities (as determined by moderation analysis) of Persistent trajectory (top left), Abstinent trajectory (top right), Improved trajectory (bottom left), and Low-stable trajectory (bottom right) by social instability and stress composite scores at 1<sup>st</sup> quartile, mean, and 3<sup>rd</sup> quartile levels, and by neighborhood disorder (NIfETy score), in the current opioid/stimulant use group. All variables were standardized to a mean of 0, and the units are in standard deviations.

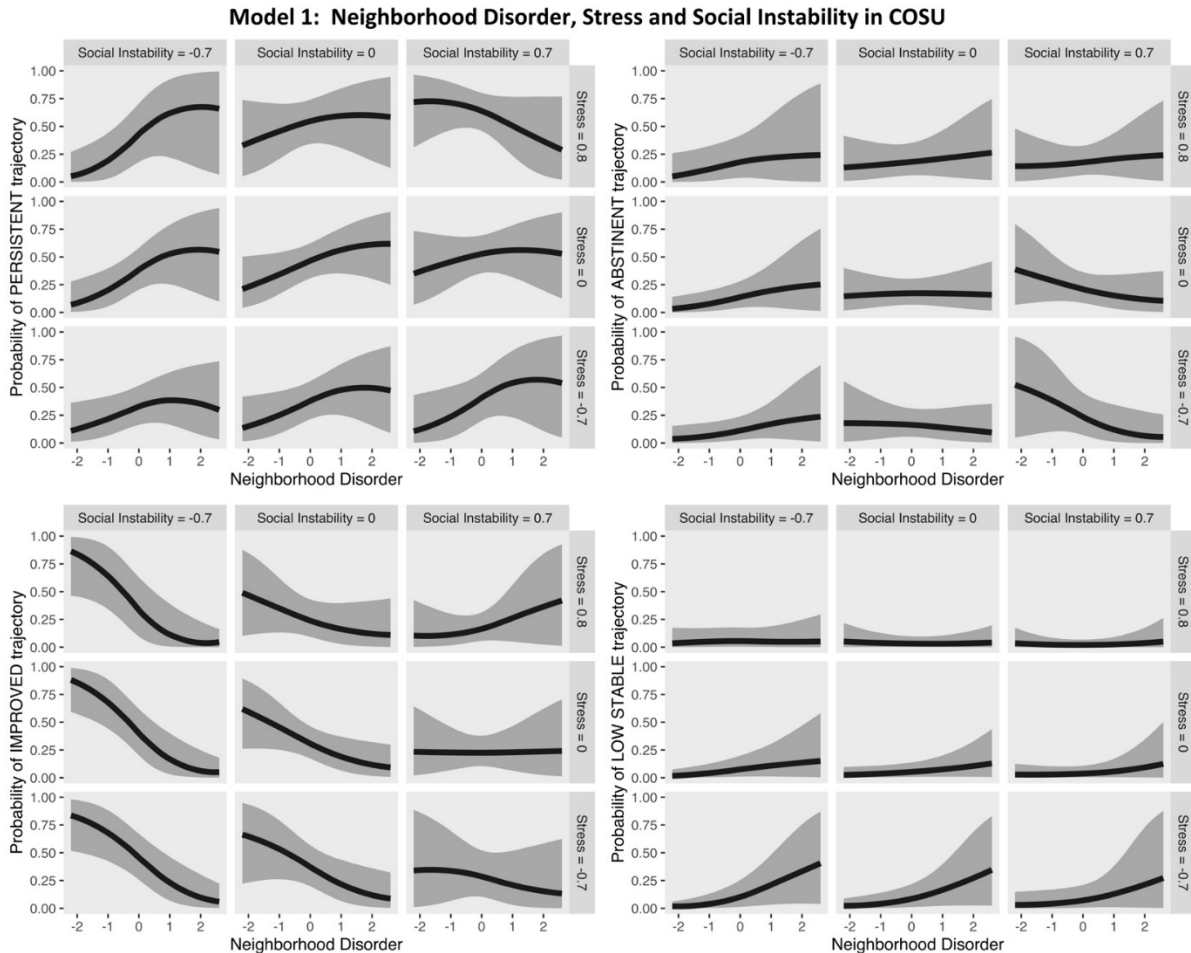

Figure 2. Interaction plots display estimated probabilities (as determined by moderation analysis) of Persistent trajectory (top left), Abstinent trajectory (top right), Improved trajectory (bottom left), and Low-stable trajectory (bottom right) by social instability and stress composite scores at 1<sup>st</sup> quartile, mean, and 3<sup>rd</sup> quartile levels, and by home value (log-transformed mean monetary value of homes within a 500-meter radius of each participant's home address), in the current opioid/stimulant use group. All variables were standardized to a mean of 0, and the units are in standard deviations.

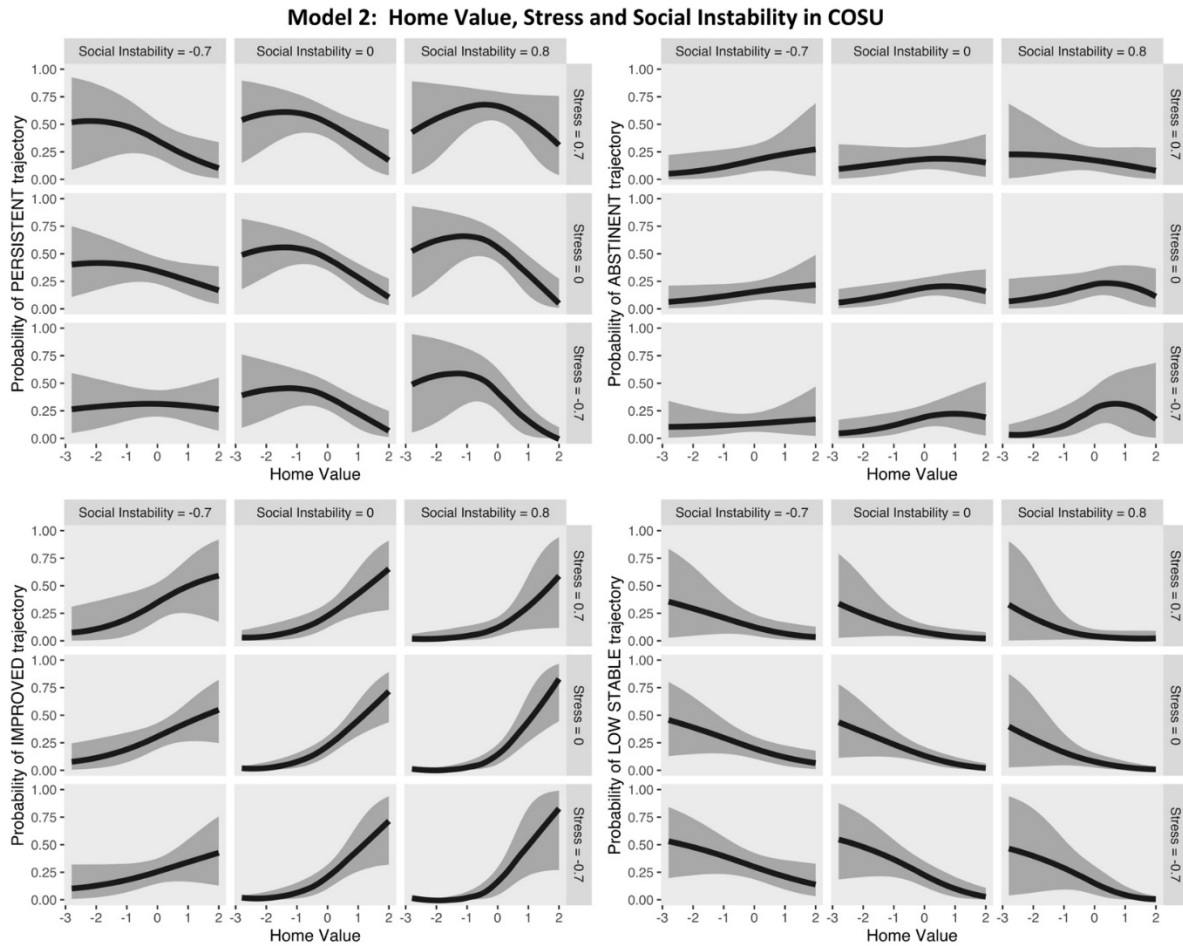

Supplement: NIHMS1917921-supplement-Supp_1.pdf [file NIHMS1917921-supplement-Supp_1.pdf]
